# Supplementary material for: Dual-targeted poly(amino acid) nanoparticles deliver drug combinations on-site: an intracellular synergistic strategy to eliminate intracellular bacteria
Source: Royal Society of Chemistry journal article supplement (doi:10.1039/d3tb00125c), 2023-01-01
Supplement: d3tb00125c1.pdf [file d3tb00125c1.pdf]

## Supporting Information

### **Dual-targeted poly(amino acid) nanoparticles on-site deliver drug combinations: an intracellular synergistic strategy to eliminate intracellular bacteria**

Dongdong Zhao<sup>a</sup>, Wenli Feng<sup>a</sup>, Xiaoxu Kang<sup>a</sup>, Haofei Li<sup>a</sup>, Fang Liu<sup>b</sup>, Weitao Zheng<sup>c</sup>, Guofeng Li<sup>a,\*</sup>, Xing Wang<sup>a,\*</sup>

<sup>a</sup> *State Key Laboratory of Organic-Inorganic Composites; Beijing Laboratory of Biomedical Materials, Beijing University of Chemical Technology, Beijing 100029, P. R. China*

<sup>b</sup> *Department of Oncology of Integrative Chinese and Western Medicine, China-Japan Friendship Hospital, Beijing, 100029, China*

<sup>c</sup> *Hubei Provincial Key Laboratory of Industrial Microbiology, Sino-German Biomedical Center, National “111” Center for Cellular Regulation and Molecular Pharmaceutics, Hubei University of Technology, Wuhan, 430068, Hubei Province, China*

\* Corresponding author

E-mail address: ligf@mail.buct.edu.cn (G. Li); wangxing@mail.buct.edu.cn (X. Wang)

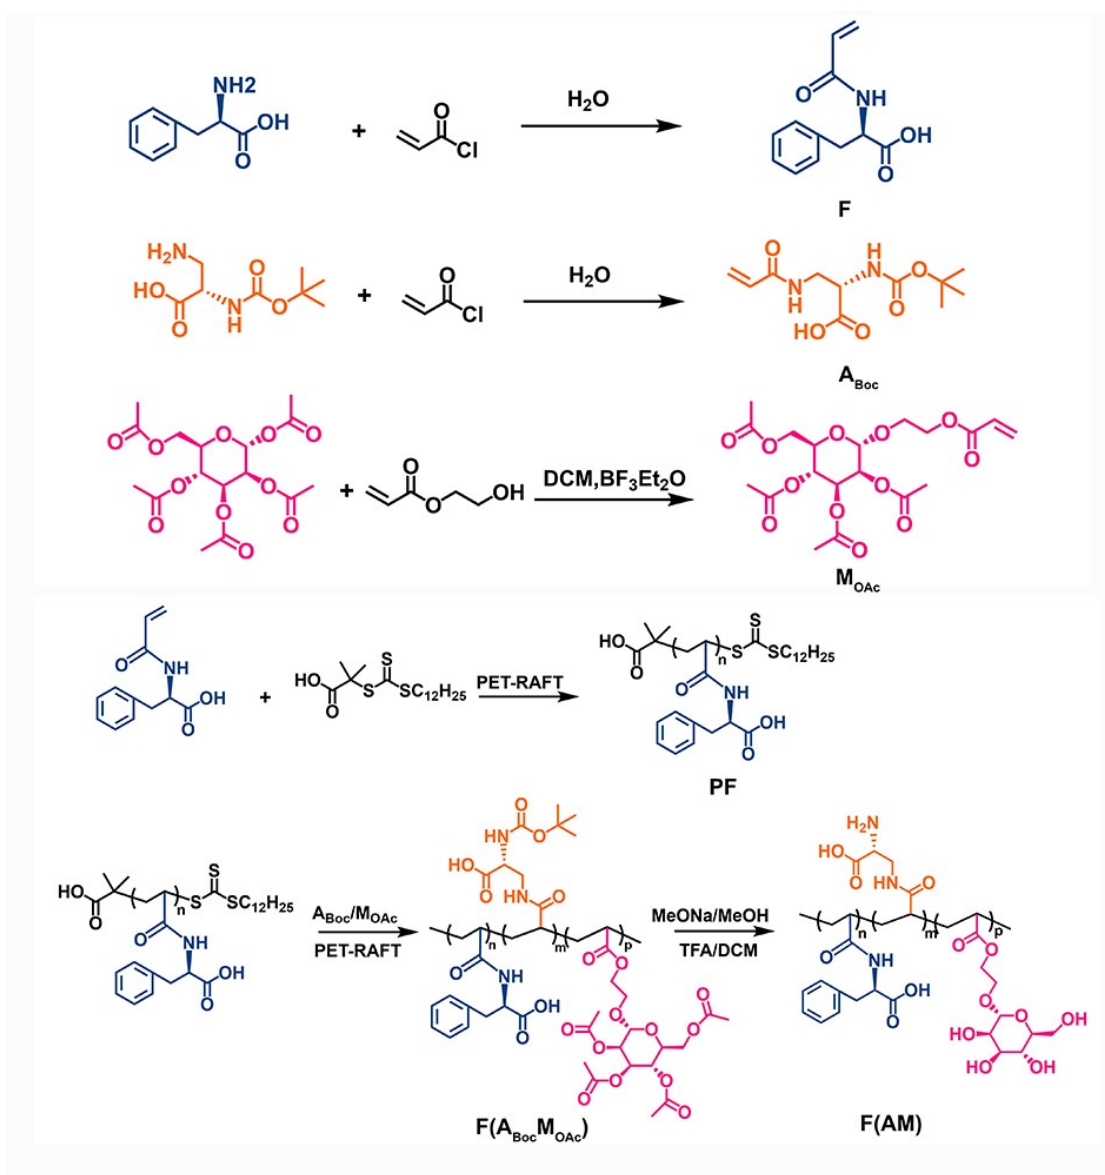

**Scheme S1.** Synthetic routes of the F, A<sub>Boc</sub>, M<sub>OAc</sub>, PF, and F(AM).

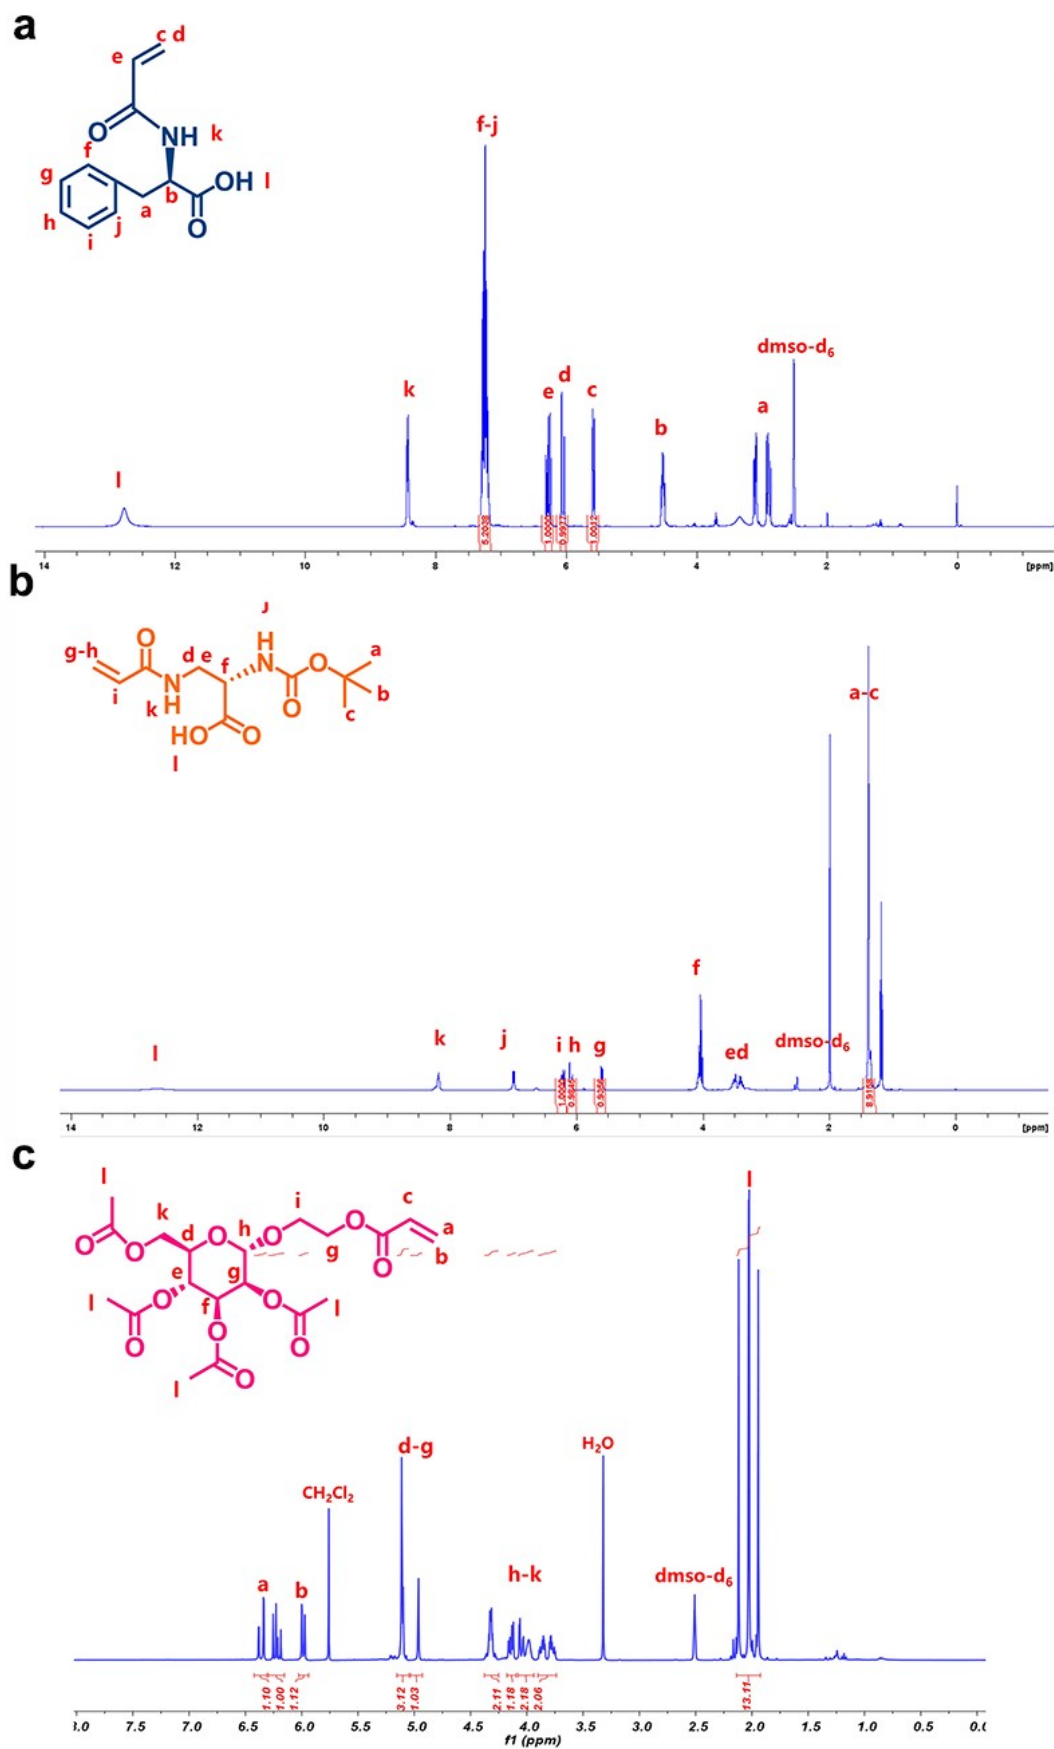

**Figure S1.**  $^1\text{H}$  NMR spectra of (a) F, (b)  $A_{\text{Boc}}$ , and (c)  $M_{\text{OAc}}$  (400 MHz,  $\text{DMSO-}d_6$ ).

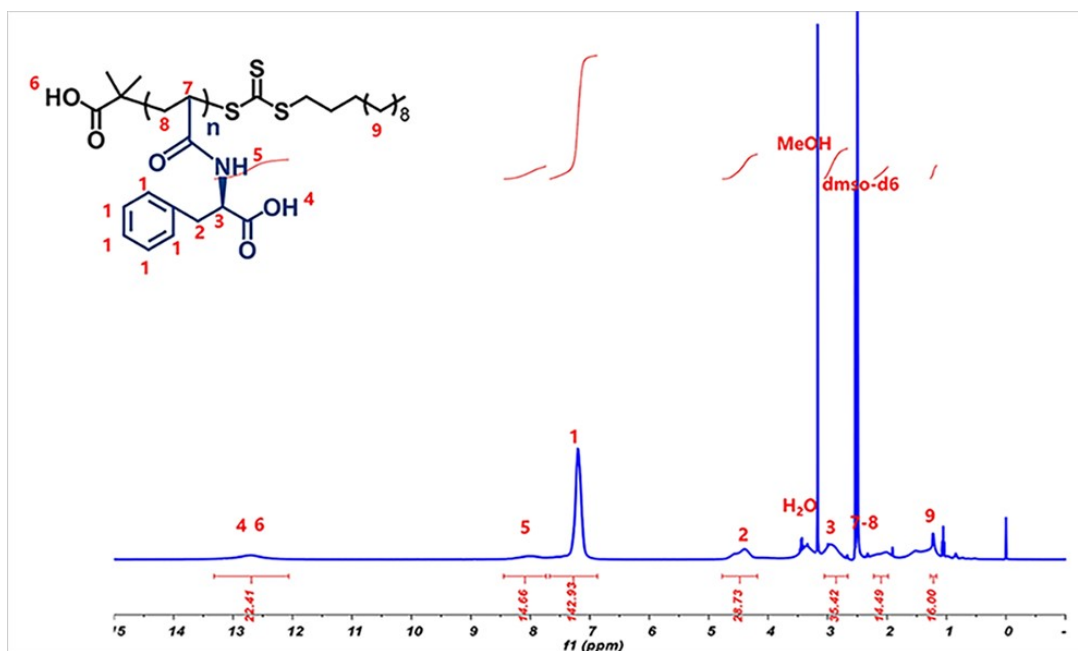

**Figure S2.**  $^1\text{H}$  NMR spectrum of the PF (400 MHz,  $\text{DMSO-}d_6$ ).

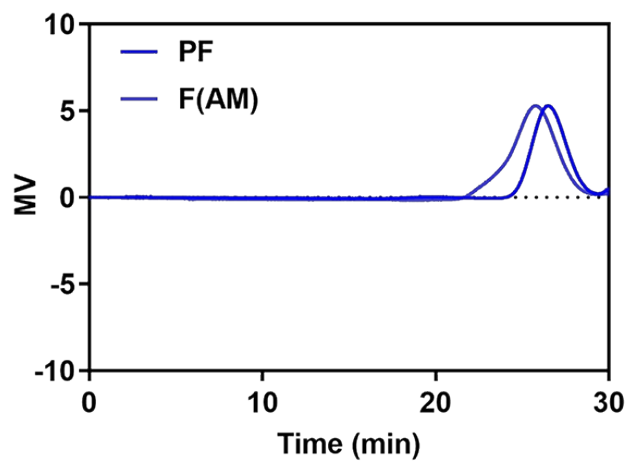

**Figure S3.** GPC curves of PF and F(AM).

**Table S1.** GPC analysis of PF and F(AM).

|              | <b>Mn</b>    | <b>PDI</b>  |
|--------------|--------------|-------------|
| <b>PF</b>    | <b>7069</b>  | <b>1.34</b> |
| <b>F(AM)</b> | <b>11451</b> | <b>1.89</b> |

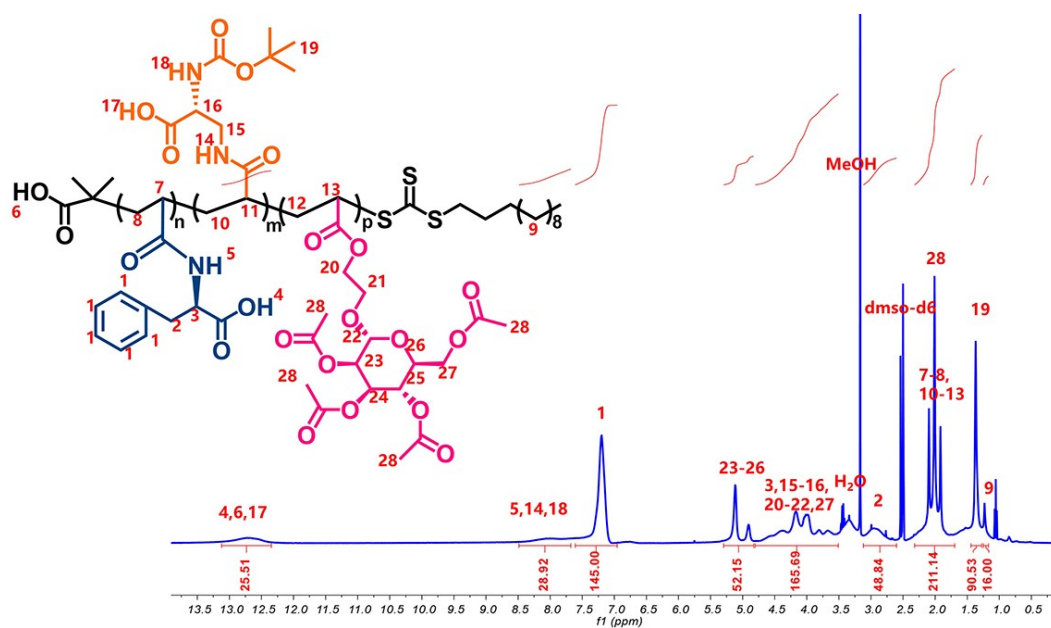

Figure S4.  $^1\text{H}$  NMR spectrum of  $\text{F}(\text{A}_{\text{Boc}}\text{M}_{\text{OAc}})$  (400 MHz,  $\text{DMSO-}d_6$ ).

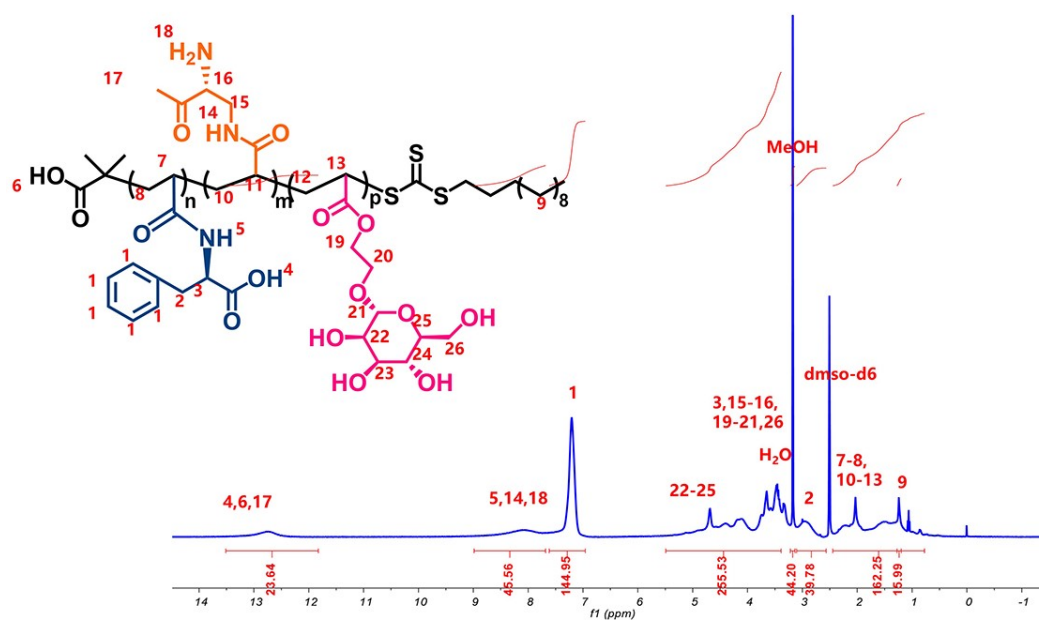

Figure S5.  $^1\text{H}$  NMR spectrum of  $\text{F}(\text{AM})$  (400 MHz,  $\text{DMSO-}d_6$ ).

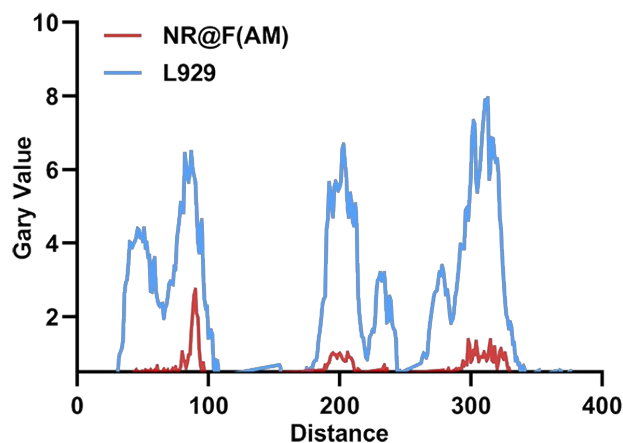

**Figure S6.** Co-localization fluorescence intensity distribution between NR@F(AM) NPs and L929 fibroblasts, which was analyzed using Image J software.

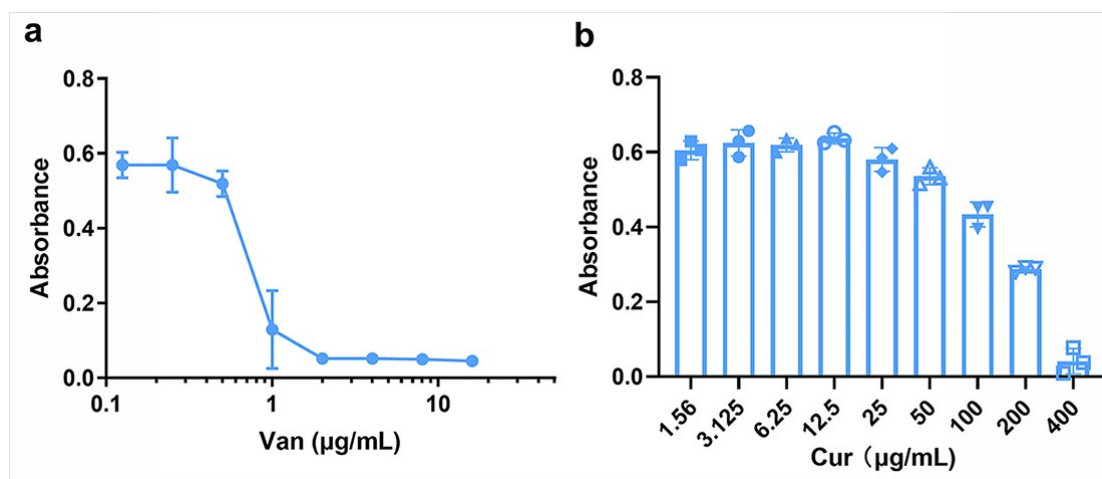

**Figure S7.** MIC assays of (a) Van and (b) Cur against MRSA.

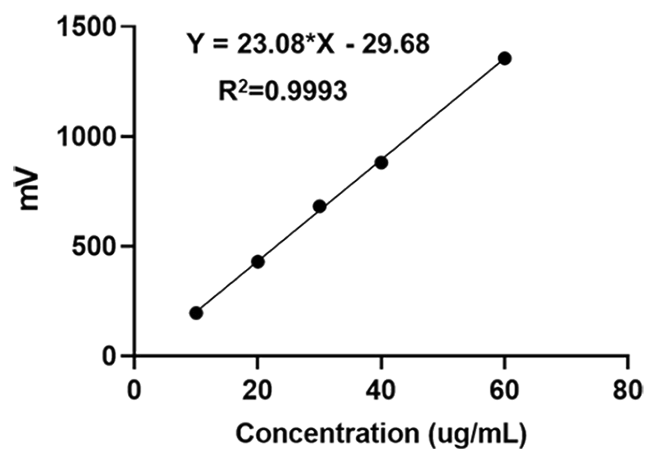

**Figure S8.** HPLC standard curve of Van. Van was monitored at a wavelength of 230 nm. The mobile phase composed of 0.01 mol/L potassium phosphate monobasic

monopotassium phosphate solution (pH 3.2) and methanol (spectroscopic grade) (80:20, v/v) at a flow rate of 1.0 mL/min.

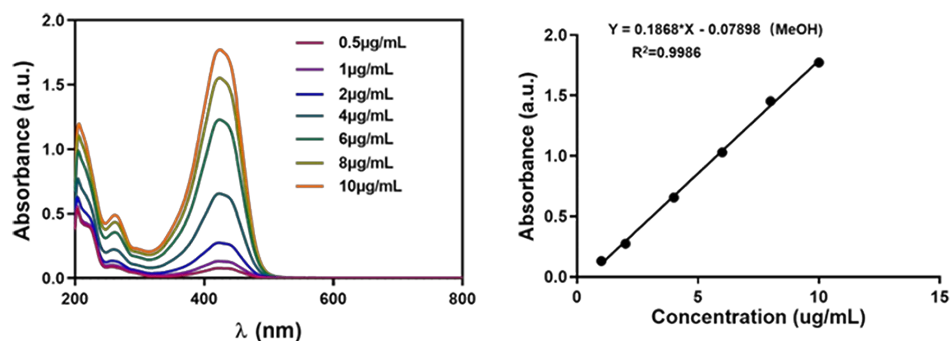

**Figure S9.** Absorption spectra of different concentrations of Cur in MeOH solution (left) and its standard curve at 425 nm wavelength (right).

**Table S2.** DLC and DLE of the (Van<sub>1.5</sub>+CUR<sub>3.0</sub>)@F(AM) NPs.

|                                                     | DLC(%)     | DLE(%)     |
|-----------------------------------------------------|------------|------------|
| (Van <sub>1.5</sub> +CUR <sub>3.0</sub> )@F(AM) NPs | (Van)13.5% | (Van)62.4% |
|                                                     | (Cur)23.2% | (Cur)54.9% |

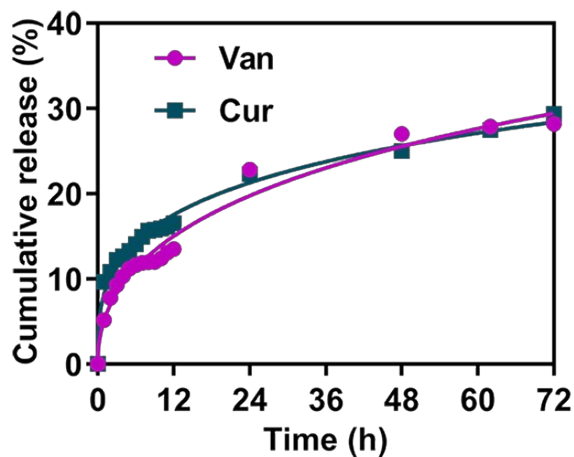

**Figure S10.** Release profiles of Van and Cur from (Van<sub>1.5</sub>+Cur<sub>3.0</sub>)@F(AM) NPs.

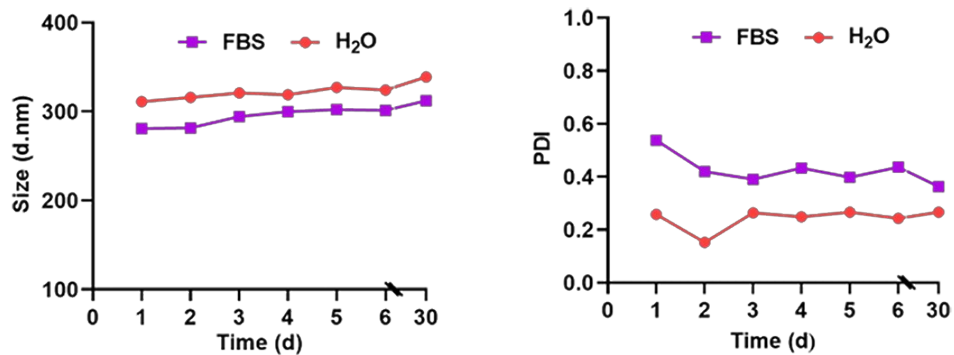

**Figure S11.** The variations of size and PDI of (Van<sub>1.5</sub>+Cur<sub>3.0</sub>)@F(AM) NPs under different conditions (H<sub>2</sub>O and 10% FBS).

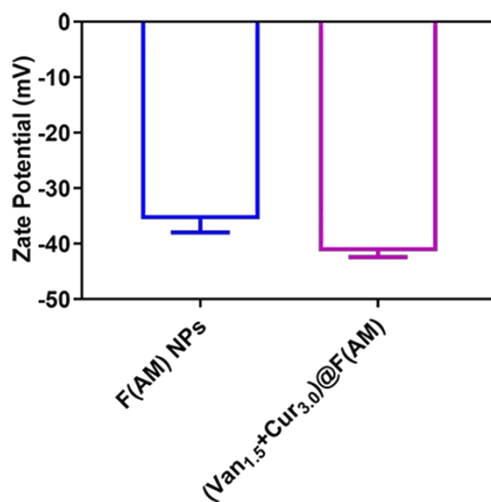

**Figure S12.** Zeta potential of F(AM) NPs and (Van<sub>1.5</sub>+Cur<sub>3.0</sub>)@F(AM) NPs.



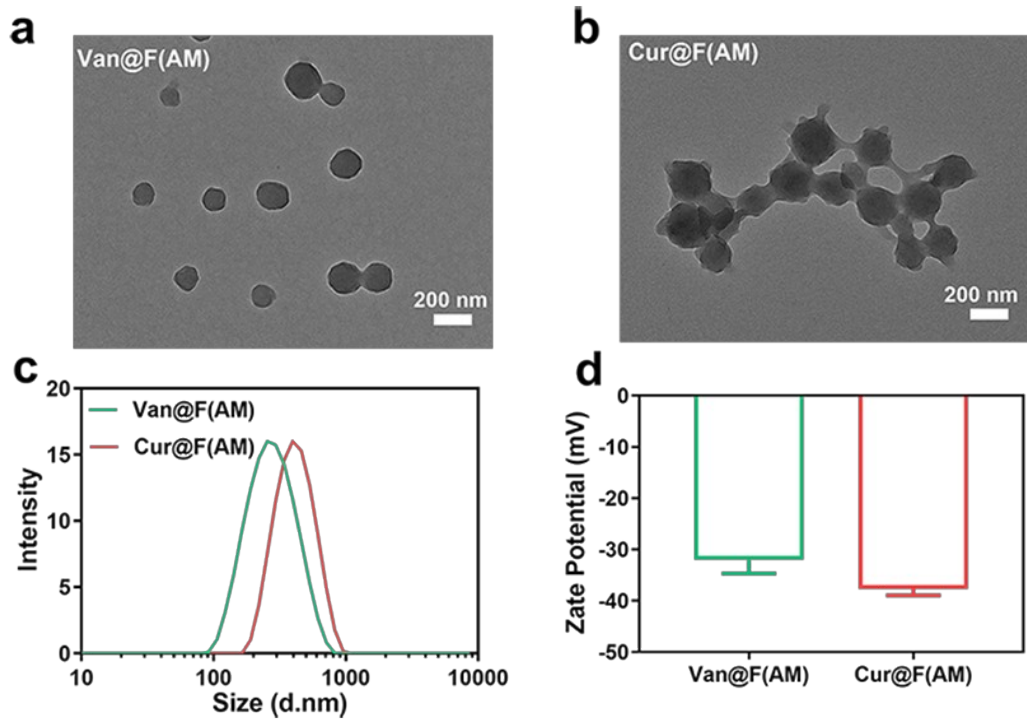

**Figure S13.** TEM image of (a) Van@F(AM) NPs and (b) Cur@F(AM) NPs. (c) Size distribution of Van@F(AM) NPs and Cur@F(AM) NPs, testing by DLS. (d) The zeta potential of Van@F(AM) NPs and Cur@F(AM) NPs.

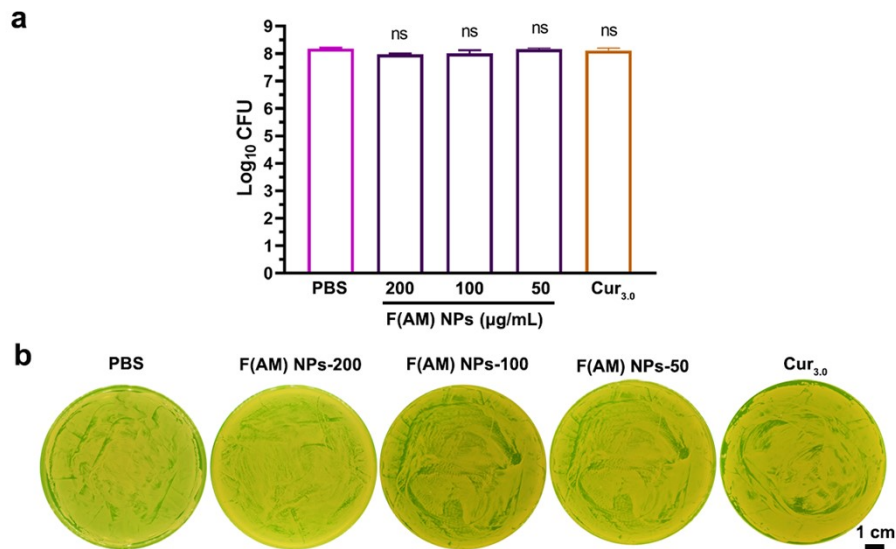

**Figure S14.** Intracellular antibacterial evaluation. (a) CFU count of intracellular MRSA after different treatments for 24 h. (b) CFU photographs of intracellular MRSA. ns  $p > 0.05$ , n = 3.

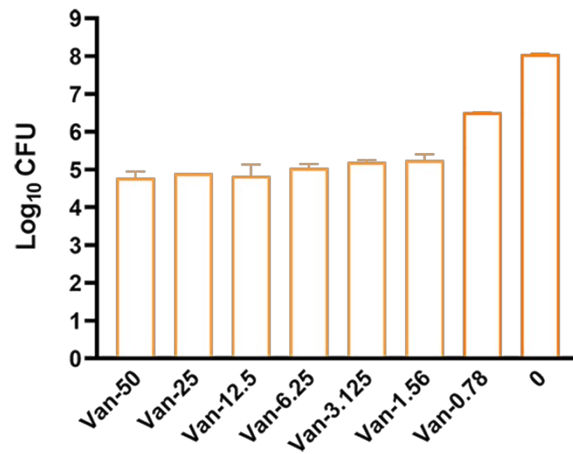

**Figure S15.** CFU of intracellular MRSA after treatment with different concentrations of Van ( $\mu\text{g/mL}$ ).

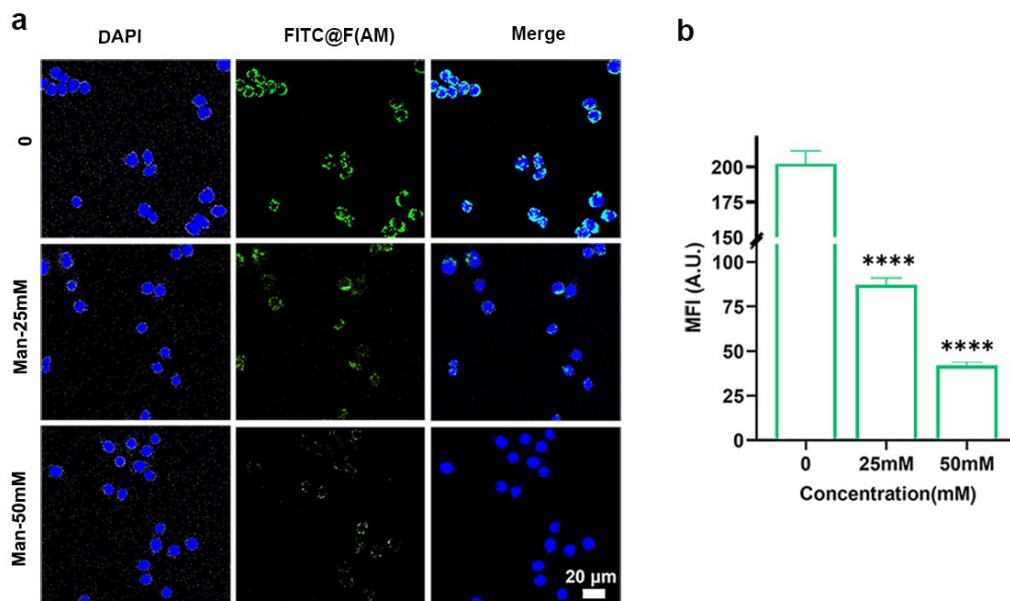

**Figure S16.** (a) CLSM observation of FITC@F(AM) NPs (green) in RAW264.7 macrophages and (b) analysis of fluorescence intensity using Image J software. (\*\*\*\*  $p < 0.0001$ ,  $n = 6$ ).

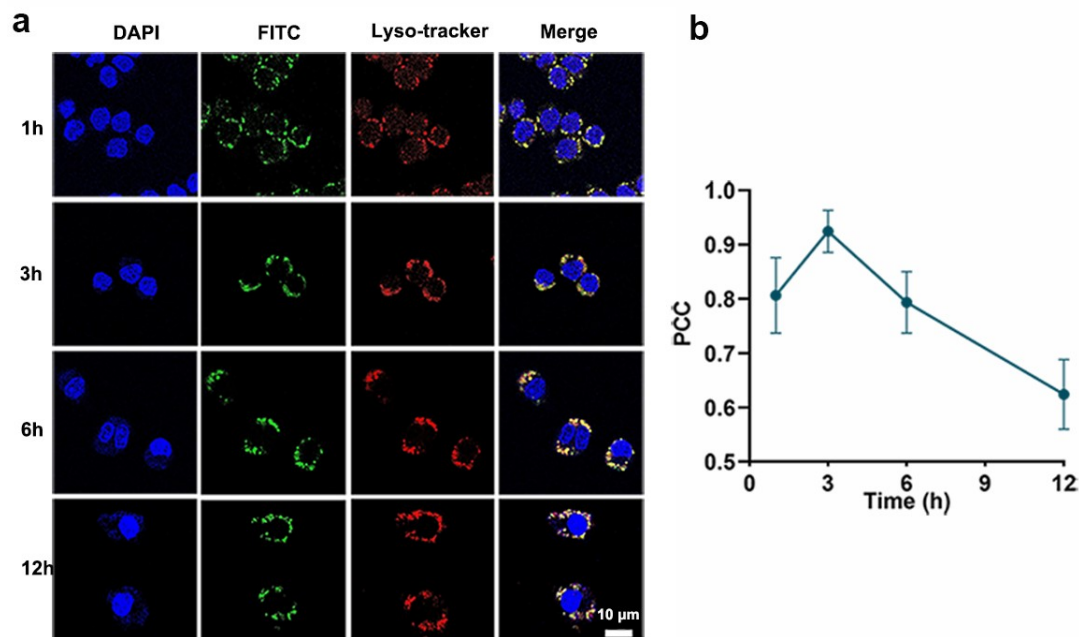

**Figure S17.** (a) CLSM observation of co-localization between FITC-labeled NPs (green) and LysoTracker (red) in RAW264.7 macrophages. (b) Evolution with the time of the Pearson's correlation coefficients between the signals from the FITC-labeled NPs and LysoTracker.

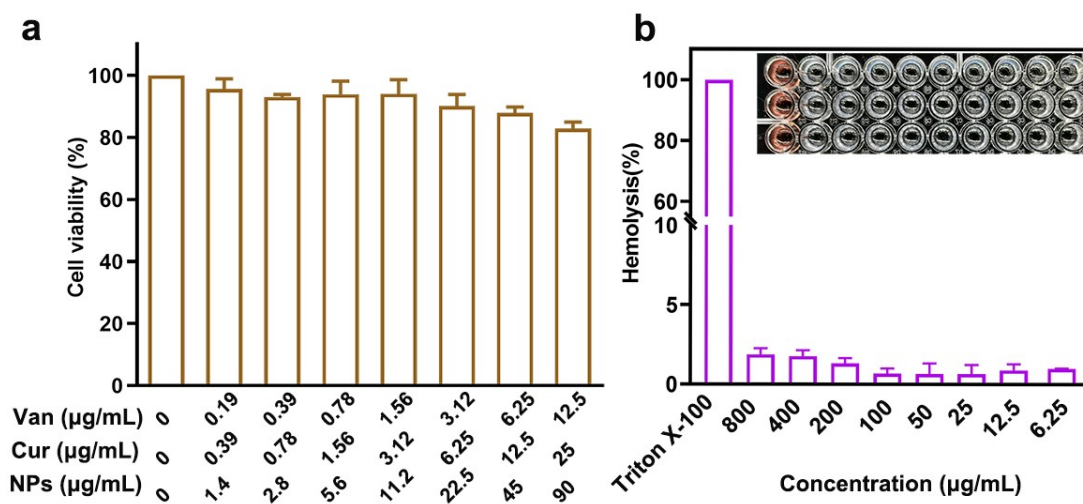

**Figure S18.** (a) The cell cytotoxicity of (Van+Cur)@F(AM) NPs against RAW264.7 macrophage. (b) The hemolysis rate of (Van+Cur)@F(AM) NPs with different concentrations.

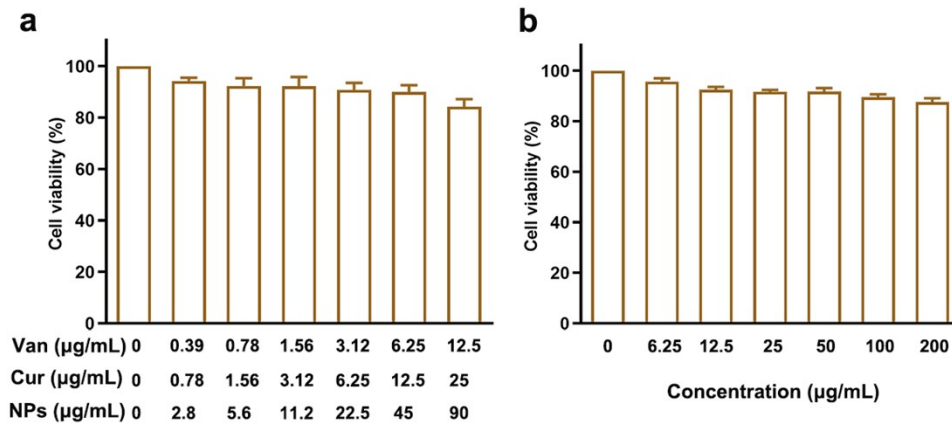

**Figure S19.** (a) The cell cytotoxicity of (Van+Cur)@F(AM) NPs against L929 fibroblasts. (b) The cell cytotoxicity of F(AM) NPs against L929 fibroblasts.

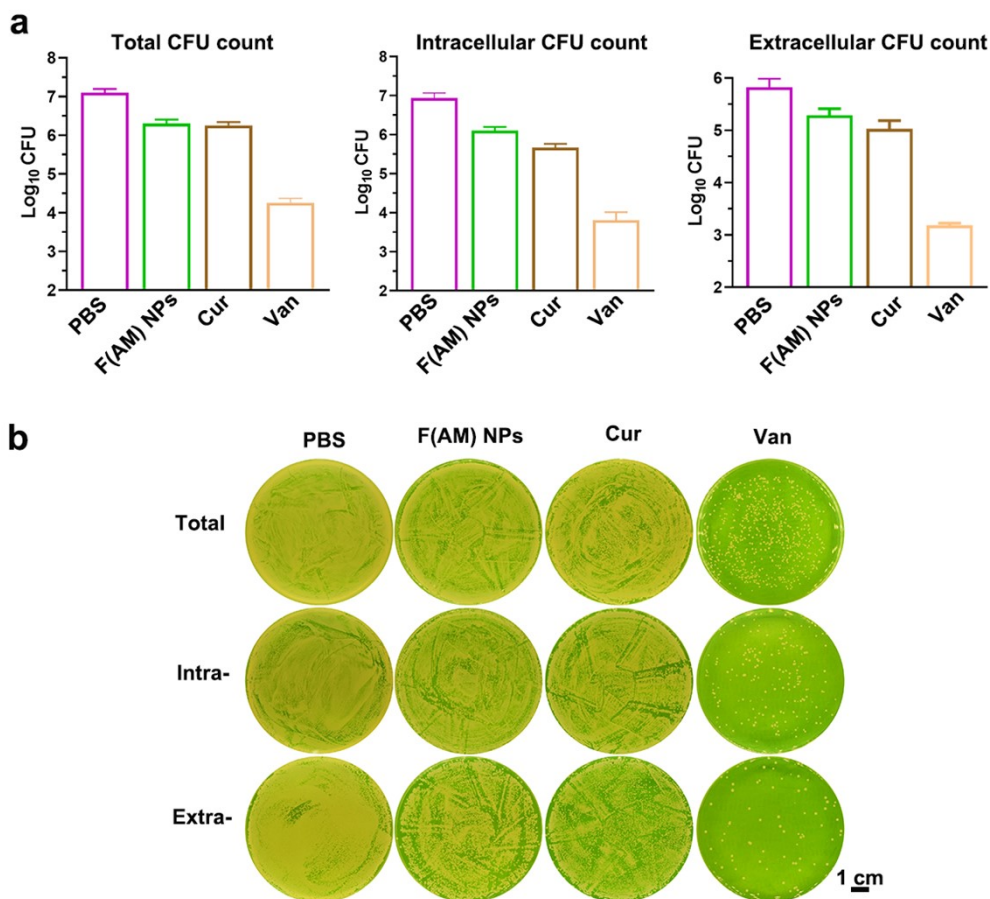

**Figure S20.** The in vivo antibacterial assays of Van (10 mg/kg), Cur (20 mg/kg) and F(AM) NPs (20 mg/kg). (a) CFUs in total, intracellular and extracellular fractions. (b) CFU photographs.



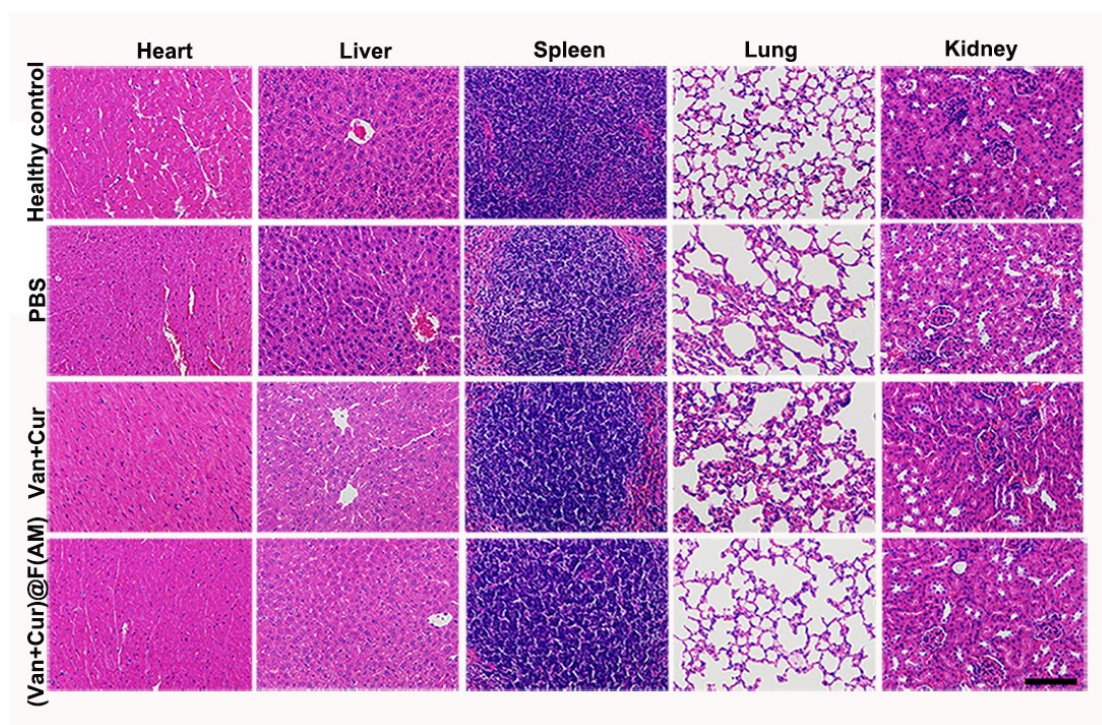

**Figure S21.** Representative H&E staining images of various organs from mice treated with healthy control, PBS, Van+Cur, and (Van+Cur)@F(AM) NPs (10 mg/kg Van, 20 mg/kg Cur). Scale bars: 200  $\mu$ m.
